# Supplementary material
Source: Royal Society of Chemistry journal article supplement (doi:10.1039/d6nj00444j)
Supplement: d6nj00444j1.pdf [file d6nj00444j1.pdf]

# Synergistic Activation of Cu<sub>2</sub>O/WO<sub>3</sub>/CF Heterostructures via Fe Doping for Efficient Neutral Hydrogen Evolution

Guojuan Hai<sup>a,\*</sup>, Jing Wang<sup>a</sup>, Wenwen Zhao<sup>a,\*</sup>, Liyun Cao<sup>b</sup>, Jianfeng Huang<sup>b,\*</sup>

<sup>a</sup> School of Materials Science and Engineering, Xi'an Shiyou University, Xi'an, Shaanxi Province 710065, China

<sup>b</sup> School of Material Science and Engineering, International S&T Cooperation Foundation of Shaanxi Province, Xi'an Key Laboratory of Green Manufacture of Ceramic Materials, Shaanxi University of Science and Technology, Xi'an, 710021, China

*E-mail:* gjhai@xsyu.edu.cn; yzwenzi@163.com; huangjf@sust.edu.cn.

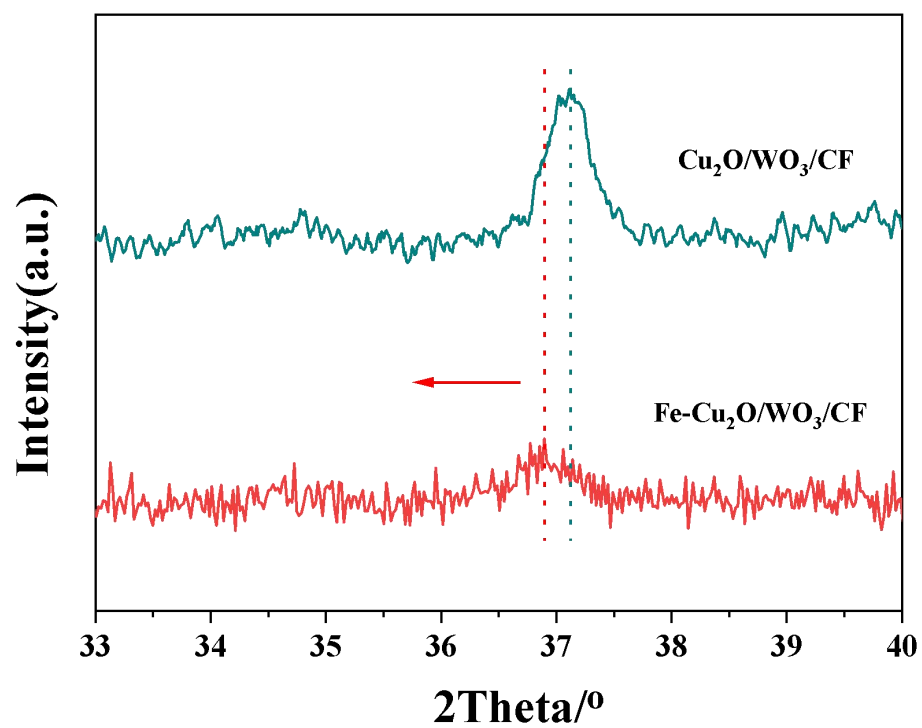

**Fig. S1** XRD patterns of Fe-Cu<sub>2</sub>O/WO<sub>3</sub>/CF.

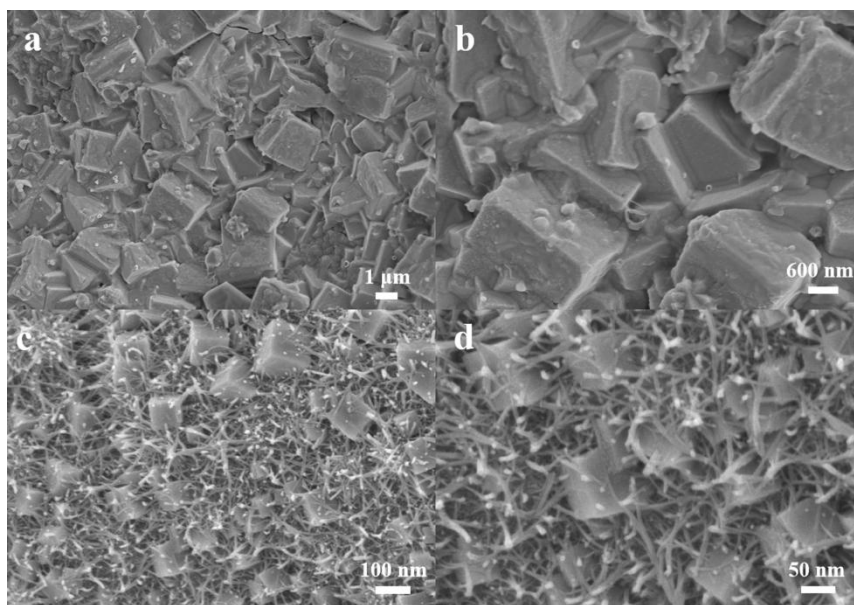

**Fig. S2** SEM images of  
(a-b) Cu<sub>2</sub>O/CF and (c-d) Cu<sub>2</sub>O/WO<sub>3</sub>/CF.

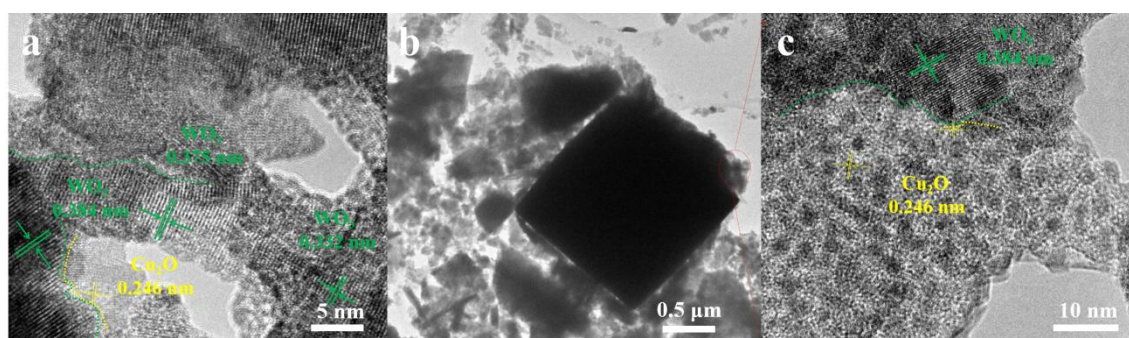

**Fig. S3** TEM and HRTEM images of Cu<sub>2</sub>O/WO<sub>3</sub>/CF.

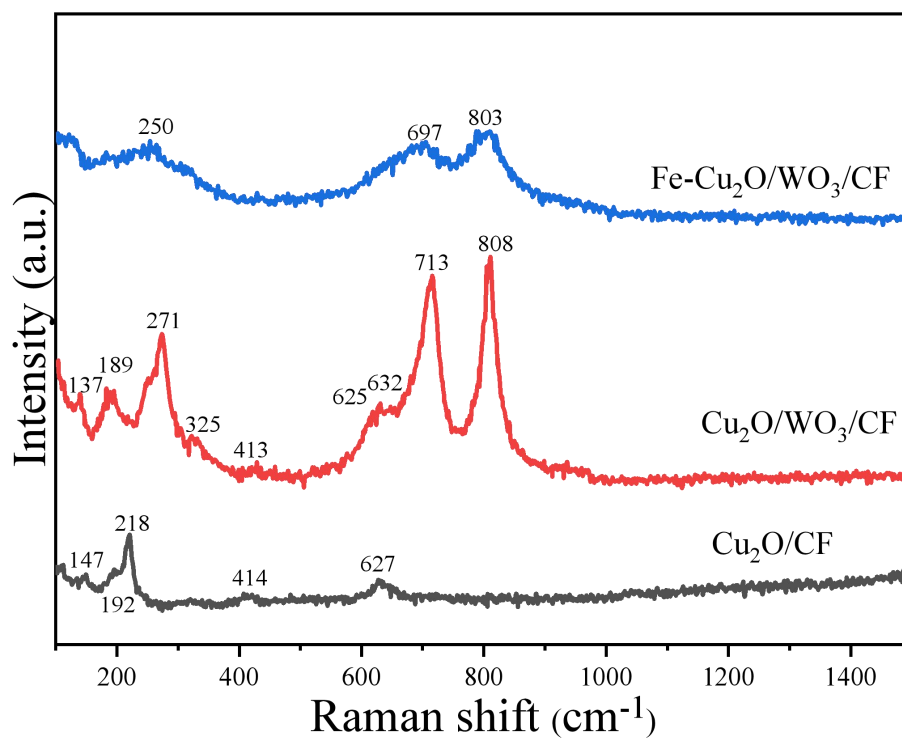

**Fig. S4** Raman images of Cu<sub>2</sub>O/CF、Cu<sub>2</sub>O/WO<sub>3</sub>/CF and Fe-Cu<sub>2</sub>O/WO<sub>3</sub>/CF

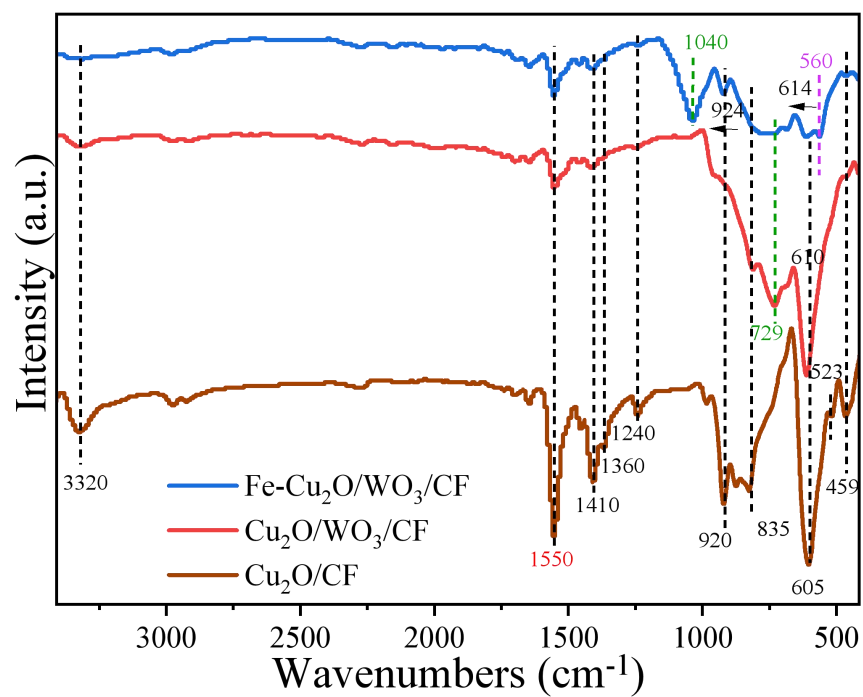

**Fig. S5** FT-IR images of Cu<sub>2</sub>O/CF, Cu<sub>2</sub>O/WO<sub>3</sub>/CF and Fe-Cu<sub>2</sub>O/WO<sub>3</sub>/CF

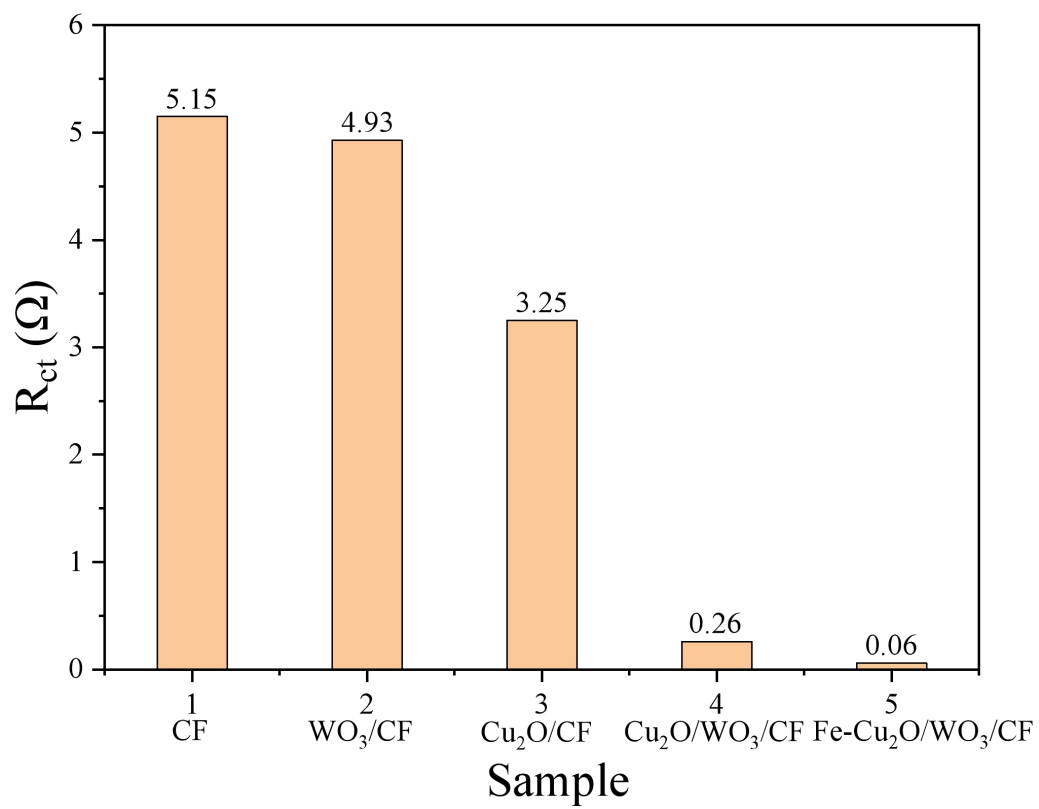

**Fig. S6** The  $R_{ct}$  values of different samples.

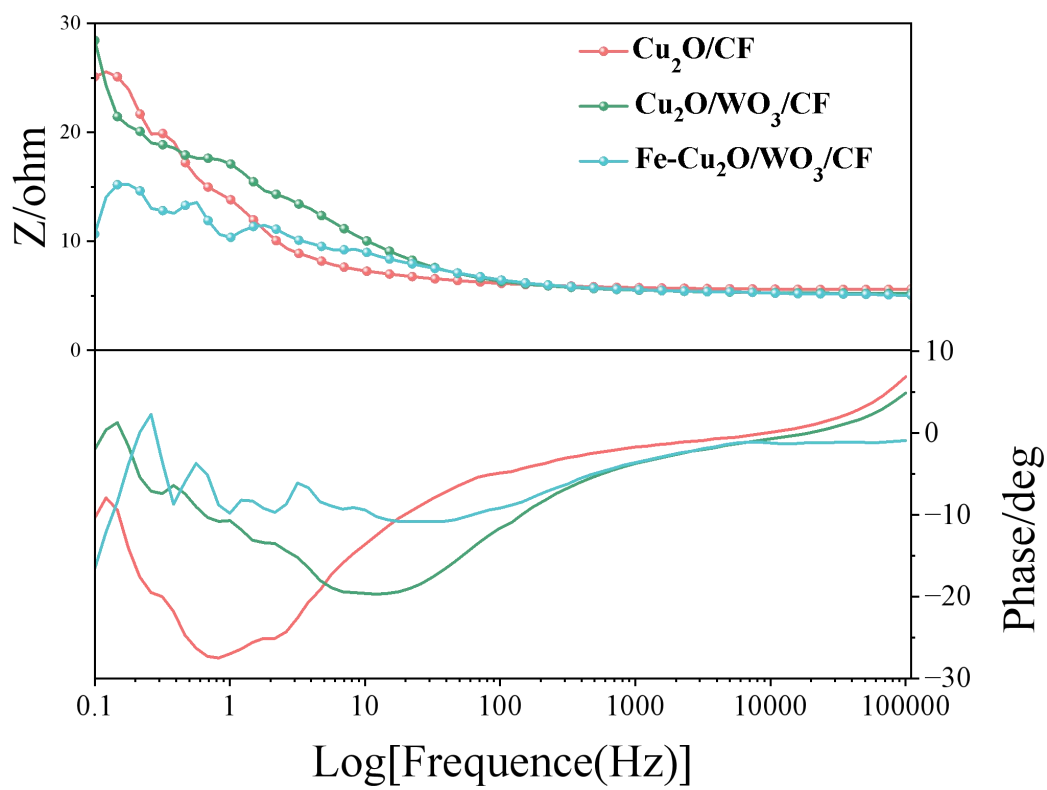

**Fig. S7** Bode plots of Cu<sub>2</sub>O/CF, Cu<sub>2</sub>O/WO<sub>3</sub>/CF and Fe-Cu<sub>2</sub>O/WO<sub>3</sub>/CF.

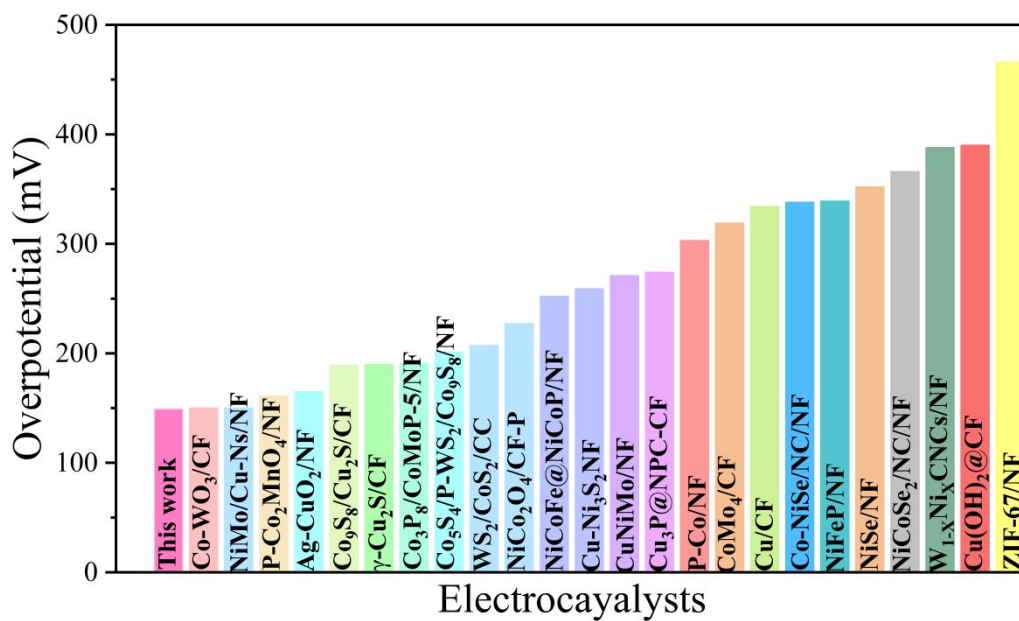

**Fig. S8** Overpotentials at a current density of  $20 \text{ mA} \cdot \text{cm}^{-2}$  for Fe-Cu<sub>2</sub>O/WO<sub>3</sub>/CF and reported catalysts in neutral electrolyte.

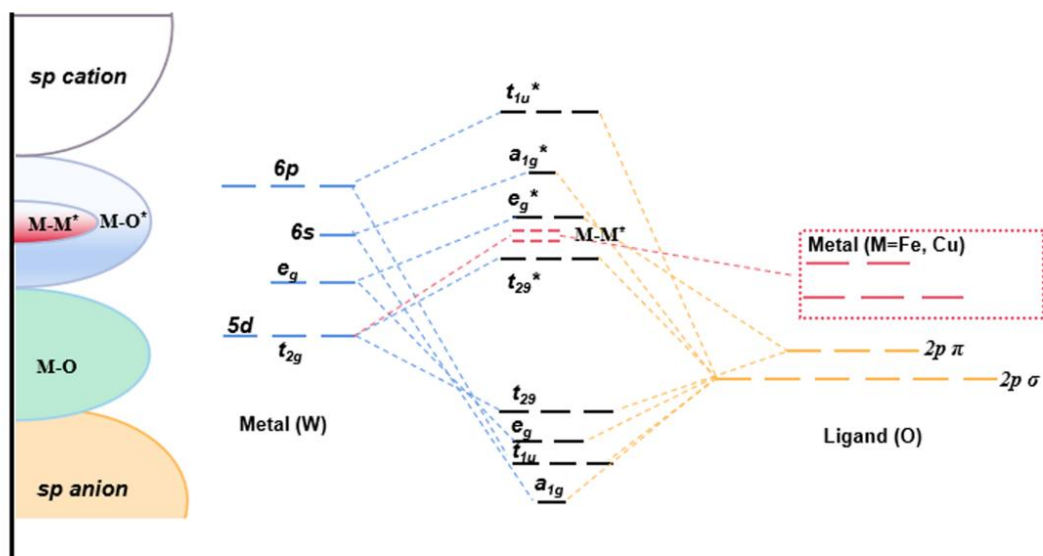

**Fig. S9** Schematic illustration of the orbital modulation

**Table S1** The characteristic frequency and electron lifetime of Cu<sub>2</sub>O/CF, Cu<sub>2</sub>O/WO<sub>3</sub>/CF and Fe-Cu<sub>2</sub>O/WO<sub>3</sub>/CF.

| Samples                                  | The characteristic frequency (Hz) | The electron lifetime(ms) |
|------------------------------------------|-----------------------------------|---------------------------|
| Fe-Cu <sub>2</sub> O/WO <sub>3</sub> /CF | 29.58                             | 5.40                      |
| Cu <sub>2</sub> O/WO <sub>3</sub> /CF    | 11.14                             | 14.20                     |
| Cu <sub>2</sub> O/CF                     | 0.82                              | 193                       |

**Table S2** Results of the fitting analysis of the XPS spectra.

| Samples                                  | %Area           |                  |                 |                  | %     |
|------------------------------------------|-----------------|------------------|-----------------|------------------|-------|
|                                          | Cu2p3/2         |                  | Cu2p1/2         |                  |       |
|                                          | Cu <sup>+</sup> | Cu <sup>2+</sup> | Cu <sup>+</sup> | Cu <sup>2+</sup> |       |
| Fe-Cu <sub>2</sub> O/WO <sub>3</sub> /CF | 15.45           | 16.32            | 19.64           | 48.59            | 54.04 |
| Cu <sub>2</sub> O/WO <sub>3</sub> /CF    | 4.64            | 21.26            | 15.47           | 58.63            | 25.15 |

  

| Samples                                  | %Area           |                 |                 |                 |                 | %                                                            |
|------------------------------------------|-----------------|-----------------|-----------------|-----------------|-----------------|--------------------------------------------------------------|
|                                          | W4f5/2          |                 |                 | W4f7/2          |                 |                                                              |
|                                          | W <sup>6+</sup> | W <sup>5+</sup> | W <sup>4+</sup> | W <sup>6+</sup> | W <sup>5+</sup> |                                                              |
| Fe-Cu <sub>2</sub> O/WO <sub>3</sub> /CF | 34.09           | 8.53            | 13.40           | 36.03           | 7.95            | (W <sup>5+</sup> +W <sup>4+</sup> )/W <sup>6+</sup><br>42.61 |
| Cu <sub>2</sub> O/WO <sub>3</sub> /CF    | 38.11           | 6.47            | 8.02            | 37.36           | 10.04           | 32.50                                                        |
